# Supplementary material
Source: PubMed Central journal article supplement (PMC8791016)
Supplement: NIHMS1770614-supplement-Supplementary_Information.pdf [file NIHMS1770614-supplement-Supplementary_Information.pdf]

**Supplementary information**

---

**Enhanced intratumoural activity of CAR T cells engineered to produce immunomodulators under photothermal control**

---

In the format provided by the authors and unedited

**Contents:**

**Supplementary Figure 1:** qPCR screen of HSPs in primary murine T cells.

**Supplementary Figure 2:** Transduction efficiencies of primary human T cells from three donors.

**Supplementary Figure 3:** Thermal switch specificity in Jurkat T cells.

**Supplementary Figure 4:** Gating strategy for viability flow staining.

**Supplementary Figure 5:** Longitudinal heating of primary human T cells.

**Supplementary Figure 6:** Repeated heat treatments do not affect CAR T cell cytotoxicity.

**Supplementary Figure 7:** CD19 expression on K562 and Raji tumour cells.

**Supplementary Figure 8:** Longitudinal control of intratumoural CAR T cells using photothermal pulses.

**Supplementary Figure 9:** TS-Fluc  $\alpha$ CD19 CAR T cell infiltration into K562 and Raji flank tumours.

**Supplementary Figure 10:** Cytokine support improves proliferation of T cells receiving low levels of CD3/28 stimulation.

**Supplementary Figure 11:** Gating strategy for mixed proliferation experiment.

**Supplementary Figure 12:** Characterization of engineered Pmel-1 T cells.

**Supplementary Figure 13:** Validation of MDA-MB-468 transduced with HER2 or Renilla Luciferase.

**Supplementary Figure 14:** TS-BiTE  $\alpha$ HER2 CAR T cells activate when incubated with HER2+ MDA-MB-468 cells.

**Supplementary Table 1:** Cell line authentication via STR analysis.

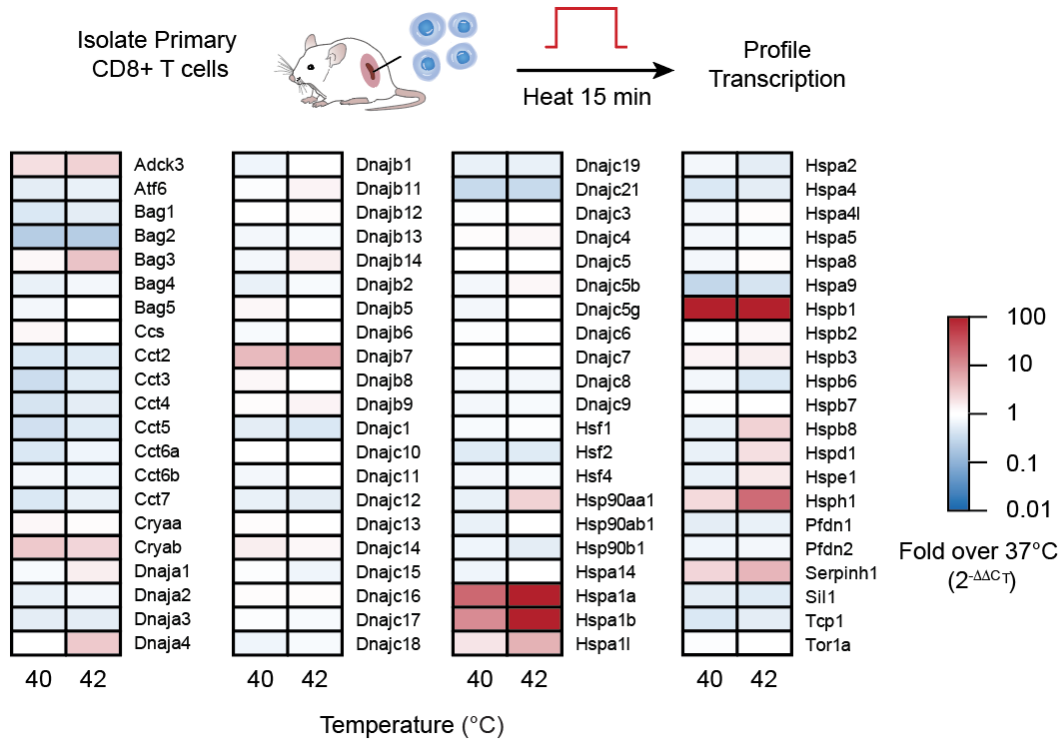

**Supplementary Figure 1: qPCR screen of HSPs in primary murine T cells.** Splenic CD8+ T cells were isolated using the CD8+ T cell isolation kit according to (Miltenyi 130-104-075). Six hours after indicated heat treatments, mRNA was harvested and quantified using the Mouse HSP profiler kit (Qiagen PAMM-076Z) according to manufacturer instructions. Data are displayed relative to unheated controls.

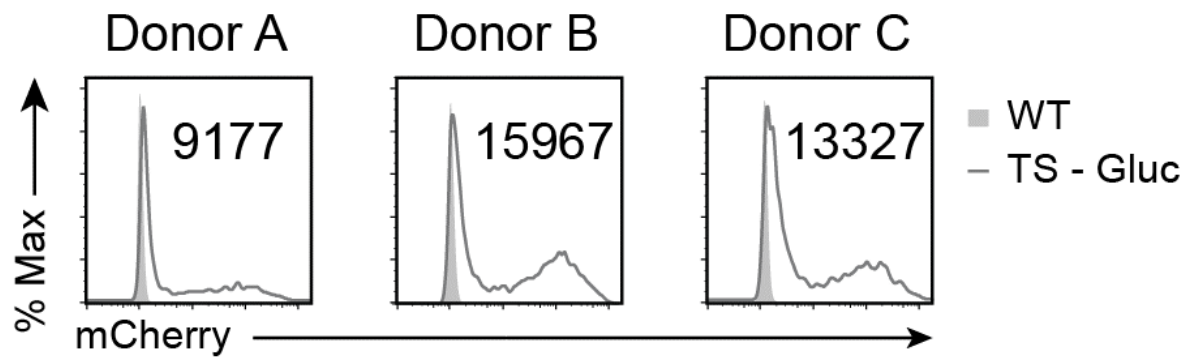

**Supplementary Figure 2: Transduction efficiencies of primary human T cells from three donors.** Flow cytometric plots of primary human T cells derived from 3 donors and transduced with the Gluc expressing 7H-YB Thermal switch containing a constitutively expressed mCherry reporter. Inset shows the mean fluorescent intensity (MFI) of mCherry transduced cells.

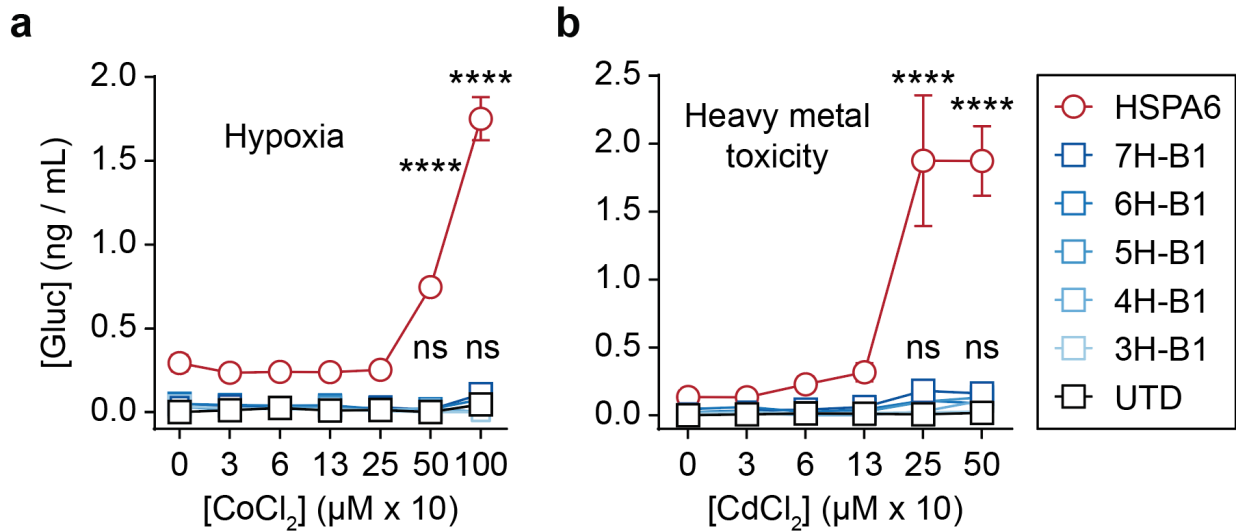

**Supplementary Figure 3: Thermal switch specificity in Jurkat T cells.** Gluc activity by Jurkat T cells transduced with synthetic thermal gene switch constructs (blue) or the endogenous HSPA6 promoter (red) following exposure to (a) CoCl<sub>2</sub> to mimic hypoxia or (b) to CdCl<sub>2</sub> to model heavy metal toxicity (ns = not significant, \*\*\*\*P<0.0001, two-way ANOVA and Tukey post-test and correction, error bars show SEM, n = 3).

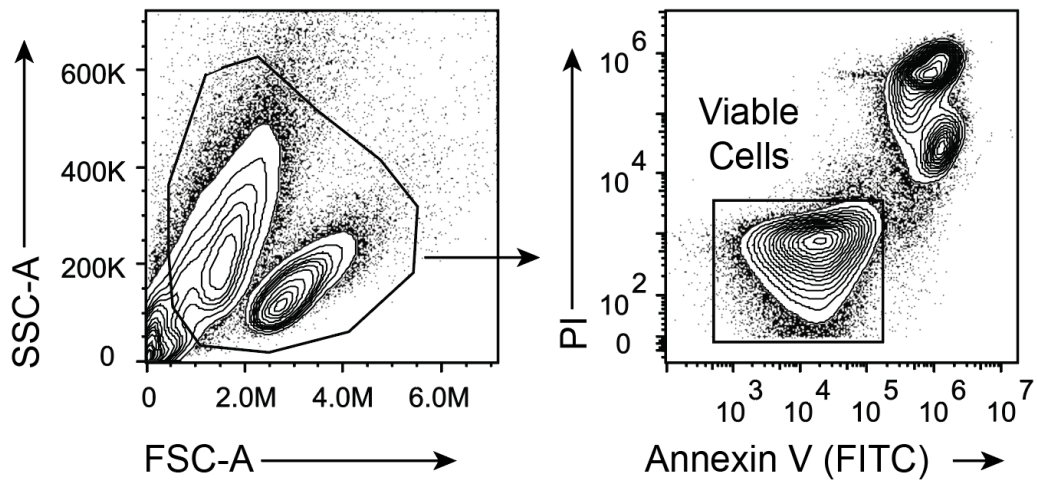

**Supplementary Figure 4: Gating strategy for viability flow staining.** Primary human T cells were heated at 42 °C for 60 minutes as a positive control for thermal damage. Shorter regimens were used for subsequent experiments. Because many of the AnnexinV+ or PI+ events were not within tighter FSC/SSC gates, this conservative gating strategy was used as it better represented the sample's overall viability.

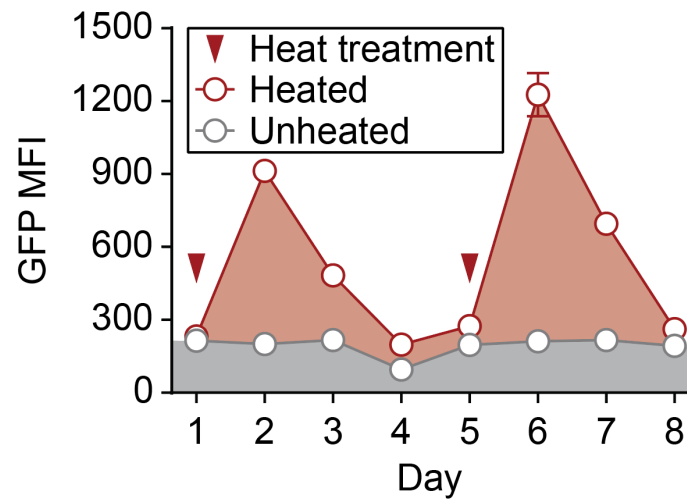

**Supplementary Figure 5: Longitudinal heating of primary human T cells.** Primary human T cells transduced with an HSPA6-GFP switch were repeatedly heated once GFP signal had returned to baseline after previous heat treatment (n = 3 biologically independent wells, error bars show SEM). Two independent experiments were performed with similar results.

**a**

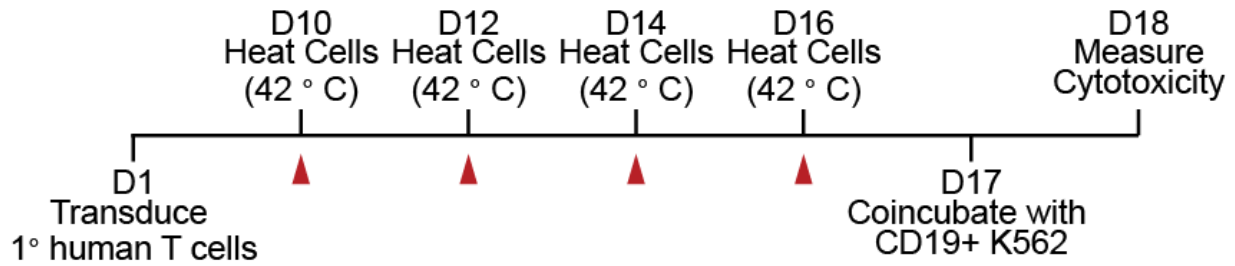

**b**

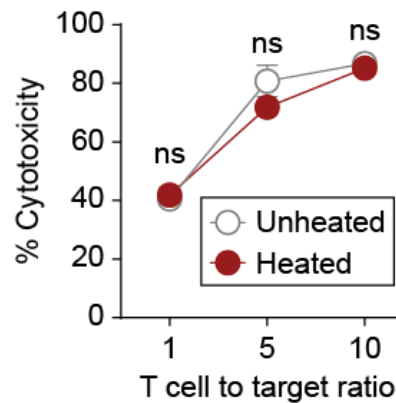

**Supplementary Figure 6: Repeated heat treatments do not affect CAR T cell cytotoxicity.** (a) Primary human T cells were transduced to constitutively express an  $\alpha$ CD19 CAR following CD3/CD28 bead activation. Heat treatments were performed at indicated timepoints prior to coincubation with luciferized, CD19+ K562s according to the timeline. (b) Percent cytotoxicity was quantified by loss of luminescence in wells relative to control wells containing only target cells (b) (ns = not significant, two-way ANOVA and Sidak post-test and correction, mean  $\pm$  SEM is depicted, n = 3 biologically independent wells).



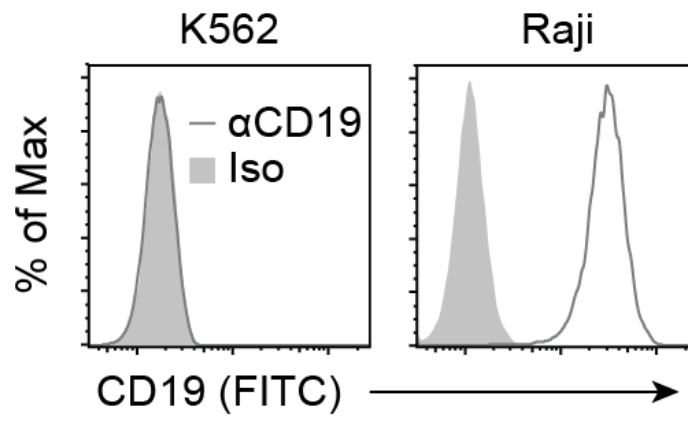

**Supplementary Figure 7: CD19 expression on K562 and Raji tumour cells.** Representative flow cytometric plots of CD19 staining on K562 and Raji cell lines (Iso = isotype control).

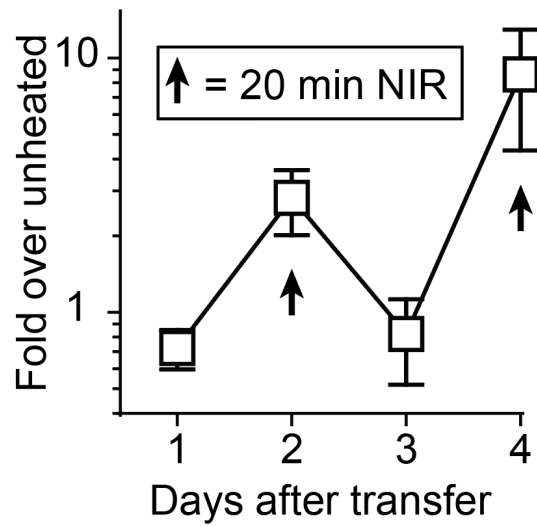

**Supplementary Figure 8: Longitudinal control of intratumoural CAR T cells using photothermal pulses.** Mice bearing Raji tumours (CD19+) were injected i.v. with TS-Fluc T cells. Tumour sites were irradiated on days 2 and 4 using NIR laser light as shown in **Figure 5d**. Luminescence was quantified daily via i.v. injections of D-luciferin (n = 3, biologically independent wells, error bars show SEM).

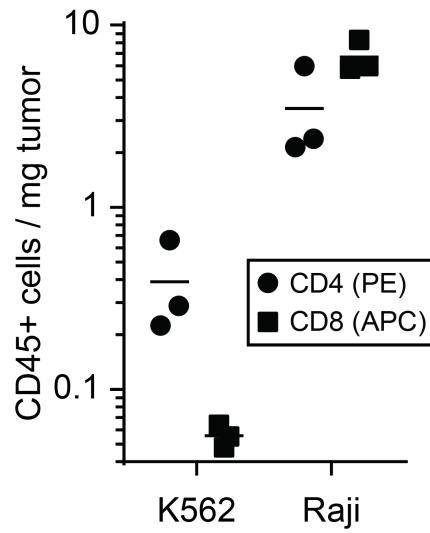

**Supplementary Figure 9: TS-Fluc  $\alpha$ CD19 CAR T cell infiltration into K562 and Raji flank tumours.** TS-Fluc  $\alpha$ CD19 CAR T cells were injected i.v. into tumour bearing mice once tumours had reached  $\sim 250$  mm<sup>3</sup>. After 7 days, tumours were resected, dissociated, and stained to quantify cellular infiltration using flow cytometry counting beads (n = 3, biologically independent wells, error bars show SEM).

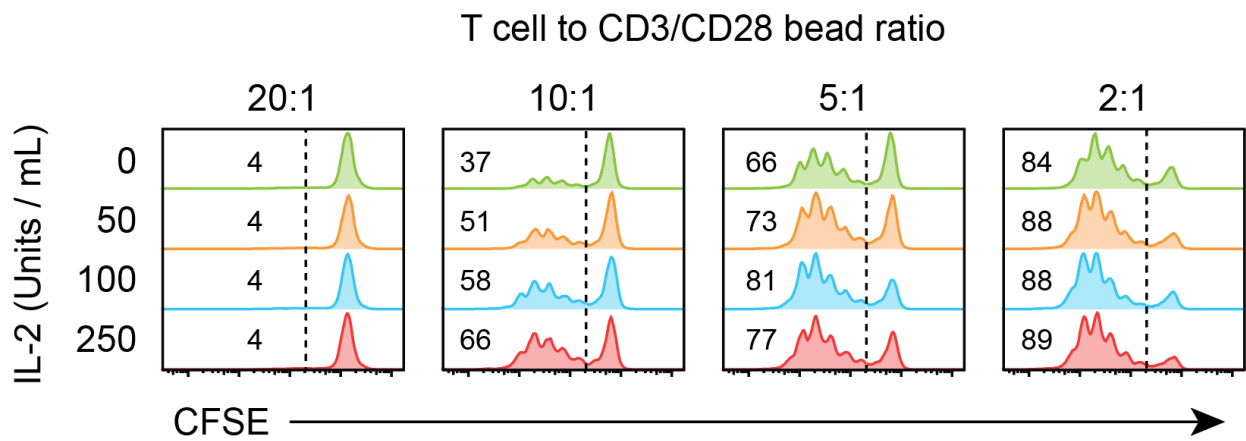

**Supplementary Figure 10: Cytokine support improves proliferation of T cells receiving low levels of CD3/28 stimulation.** T cells were labeled with CFSE and incubated with low levels of activating beads. For reference, routine expansion and culture of T cells uses 3 beads for every T cell. Increasing amounts of IL-2 were added to each bead ratio. All samples were assayed after 4 day incubations at indicated conditions. Two independent experiments were performed with similar results.

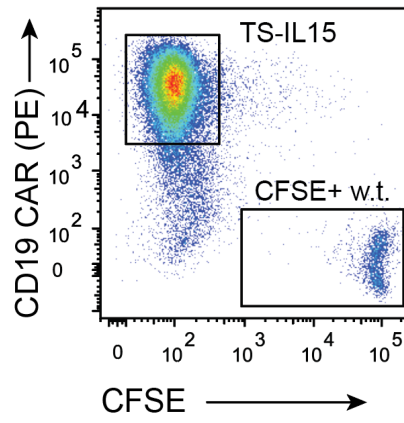

**Supplementary Figure 11: Gating strategy for mixed proliferation experiment.** Transduced TS-15  $\alpha$ CD19 CAR T cells were identified by CAR expression. Proliferation of CFSE+ wild-type cells was assessed by dye dilution and FlowJo proliferation tool.

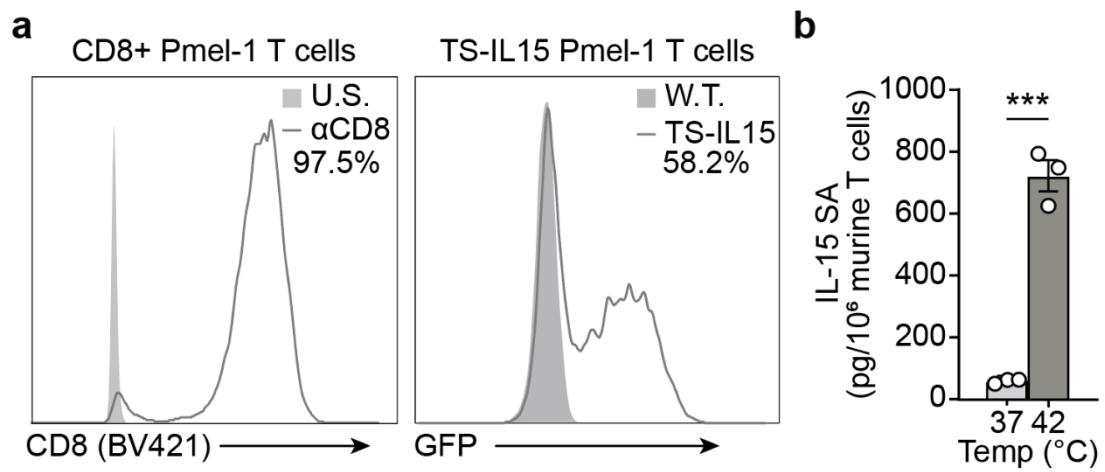

**Supplementary Figure 12: Characterization of engineered Pmel-1 T cells.** 48 hours post isolation and peptide activation, Pmel-1 derived splenocytes were transduced with the TS-IL15 vector containing a constitutive GFP reporter. **(a)** Pmel-1 T cells were characterized via flow cytometry before adoptive transfer to assess CD8+ cell purity expansion (left) and transduction efficiency (right) (U.S. = Unstained Pmel-1 T cells, W.T = Wild type Pmel-1 T cells). **(b)** IL-15 production measured via ELISA from transduced murine T cells after 20 minute heating at indicated temperatures (\*\*\*) P=0.0002, unpaired T test, mean± SEM is depicted, n = 3 biologically independent wells).

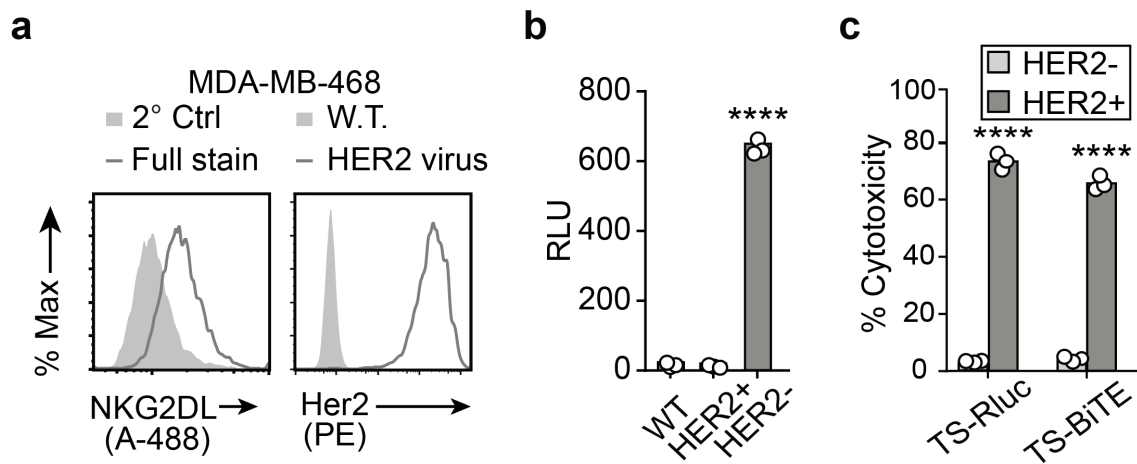

**Supplementary Figure 13: Validation of MDA-MB-468 transduced with HER2 or Renilla Luciferase.** (a) Representative flow plots of NKG2DL staining and HER2 Staining of HER2+ MDA-MB-468s. MDA-MB-468 were transduced with lentivirus to stably surface express HER2. (b) Luminescence of Fluc transduced HER2- MDA-MB-468 tumour cells (\*\*\*\*  $P < 0.0001$ , one-way ANOVA and Sidak post-test and correction, mean  $\pm$  SEM is depicted,  $n = 3$  biologically independent wells). (c) Percent cytotoxicity observed via LDH assay in HER2- or HER2+ MDA-MB-468 cells after incubation with T cells constitutively expressing CARs (\*\*\*\* $P < 0.0001$  between HER2- and HER2+ groups, two-way ANOVA and Sidak post-test correction, mean  $\pm$  SEM is depicted,  $n = 3$  biologically independent wells). Two independent experiments were performed with similar results.

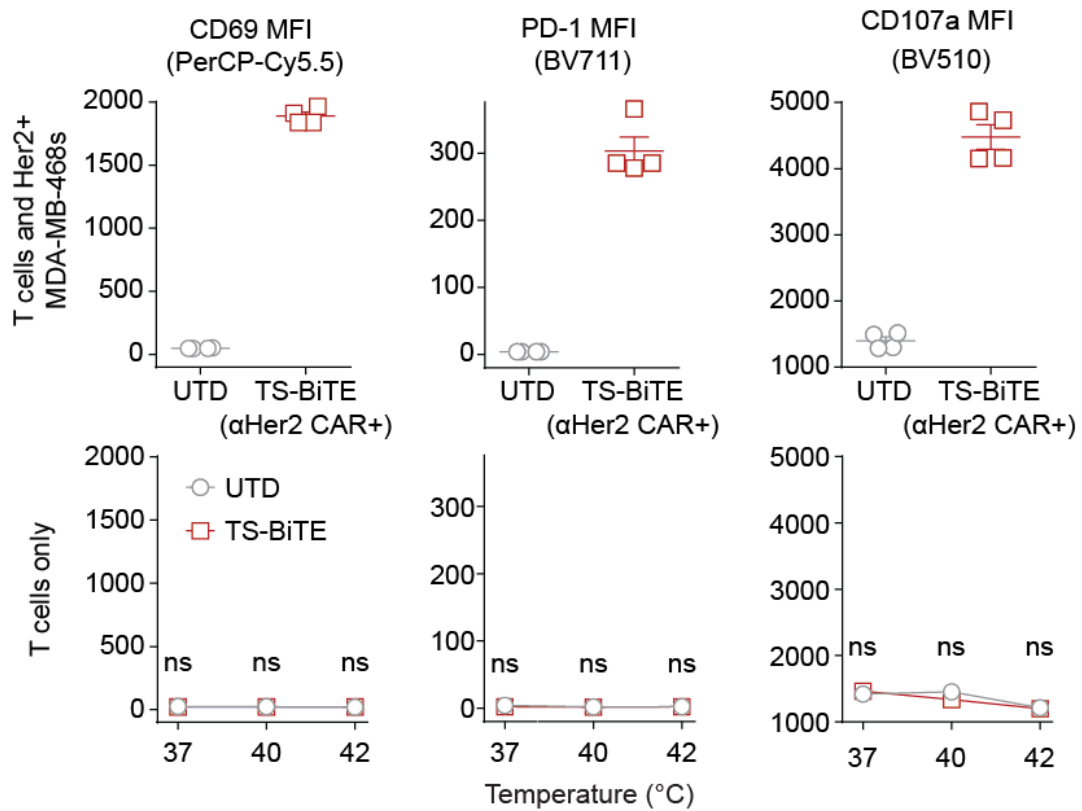

**Supplementary Figure 14: TS-BiTE  $\alpha$ HER2 CAR T cells activate when incubated with HER2+ MDA-MB-468 cells.** MFIs of activation and degranulation markers CD69, PD-1, and CD107a on TS-BiTE  $\alpha$ HER2 CAR T cells that were heated at indicated temperatures prior to co-incubation with HER2+ MDA-MB-468 target cells. (ns = not significant, two-way ANOVA and Tukey post-test and correction, error bars show SEM, n = 4 biologically independent wells).



| <b>Genetic Locus</b> | <b>Jurkat E6.1</b>     | <b>K-562</b> | <b>MDA-MB-468</b> | <b>Raji</b>  |
|----------------------|------------------------|--------------|-------------------|--------------|
| D3S1358              | 15, 17                 | 16           | 15                | 15, 16       |
| TH01                 | 6, 9.3                 | 9.3          | 7                 | 6, 7         |
| D21S11               | 31.2, 32.2, 33.2, 34.2 | 29, 30, 31   | 27, 28            | 28, 31       |
| D18S51               | 13, 20, 21             | 15, 16       | 17                | 17           |
| Penta E              | 10, 12                 | 5, 14        | 5                 | 5, 13        |
| D5S818               | 9                      | 11, 12       | 12                | 10, 13       |
| D13S317              | 8, 12                  | 8            | 12                | 13           |
| D7S820               | 8, 12, 13              | 9, 11        | 8                 | 10           |
| D16S539              | 11                     | 11, 12       | 9                 | 8, 11        |
| CSF1PO               | 10, 11, 12, 13         | 9, 10        | 12                | 10, 12       |
| Penta D              | 11, 13                 | 9, 13        | 8, 10             | 3.2, 9       |
| vWA                  | 18, 19                 | 16           | 18                | 16, 19       |
| D8S1179              | 13, 14, 15             | 12           | 13                | 14, 15       |
| TPOX                 | 8, 10                  | 8, 9         | 8, 9              | 8, 13        |
| FGA                  | 20, 21                 | 21           | 23                | 19, 27       |
| AMEL                 | X, Y                   | X            | X                 | X, Y         |
| Mouse Contamination  | Not detected           | Not Detected | Not Detected      | Not Detected |
| <b>% Match</b>       | <b>91.89%</b>          | <b>100%</b>  | <b>100%</b>       | <b>100%</b>  |

**Supplementary Table 1: Cell line authentication via STR analysis.** Jurkat E6.1, K-562, MDA-MB-468, and Raji human cell lines were authenticated via PowerPlex16HS STR profiling (Labcorp). Results were compared to known samples in the Cellosaurus STR Similarity Search Tool (CLASTR 1.4.4) database.
